# Supplementary material
Source: MDPI journal article supplement (https://www.mdpi.com/2073-4344/8/7/285)
Supplement: s1 [file s1]

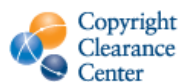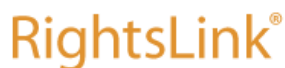
[My Orders](#)
[My Library](#)
[My Profile](#)

 Welcome vodyankina\_o@mail.ru [Log out](#) | [Help](#)
[My Orders](#) > [Orders](#) > [All Orders](#)

## License Details

This Agreement between Tomsk State University -- Olga Vodyankina ("You") and Elsevier ("Elsevier") consists of your license details and the terms and conditions provided by Elsevier and Copyright Clearance Center.

[Print](#)   [Copy](#)

|                                                 |                                                                                                                                                    |
|-------------------------------------------------|----------------------------------------------------------------------------------------------------------------------------------------------------|
| License Number                                  | 4375850956224                                                                                                                                      |
| License date                                    | Jun 25, 2018                                                                                                                                       |
| Licensed Content Publisher                      | Elsevier                                                                                                                                           |
| Licensed Content Publication                    | Catalysis Today                                                                                                                                    |
| Licensed Content Title                          | Formation of oxygen active species in Ag-modified CeO2 catalyst for soot oxidation: A DFT study                                                    |
| Licensed Content Author                         | Gloria Preda, Gianfranco Pacchioni                                                                                                                 |
| Licensed Content Date                           | Nov 22, 2011                                                                                                                                       |
| Licensed Content Volume                         | 177                                                                                                                                                |
| Licensed Content Issue                          | 1                                                                                                                                                  |
| Licensed Content Pages                          | 8                                                                                                                                                  |
| Type of Use                                     | reuse in a journal/magazine                                                                                                                        |
| Requestor type                                  | author of new work                                                                                                                                 |
| Intended publisher of new work                  | MDPI AG                                                                                                                                            |
| Portion                                         | figures/tables/illustrations                                                                                                                       |
| Number of figures/tables/illustrations          | 1                                                                                                                                                  |
| Format                                          | electronic                                                                                                                                         |
| Are you the author of this Elsevier article?    | No                                                                                                                                                 |
| Will you be translating?                        | No                                                                                                                                                 |
| Original figure numbers                         | Fig. 2                                                                                                                                             |
| Title of the article                            | Ag/CeO2 composites for catalytic abatement of CO, soot and VOCs                                                                                    |
| Publication new article is in                   | Catalysts                                                                                                                                          |
| Publisher of the new article                    | MDPI AG                                                                                                                                            |
| Author of new article                           | M.V. Grabchenko, N.N. Mikheeva, G.V. Mamontov, M.A. Salaev, L.F. Liotta O.V. Vodyankina                                                            |
| Expected publication date                       | Jan 2019                                                                                                                                           |
| Estimated size of new article (number of pages) | 38                                                                                                                                                 |
| Requestor Location                              | Tomsk State University<br>36, Lenin ave.<br><br>Tomsk, Tomsk region 634050<br>Russian Federation<br>Attn: Tomsk State University<br>GB 494 6272 12 |
| Publisher Tax ID                                |                                                                                                                                                    |
| Total                                           | <b>0.00 USD</b>                                                                                                                                    |

[BACK](#)
