# Supplementary material
Source: MDPI journal article supplement (https://www.mdpi.com/2073-4344/8/7/285)
Supplement: s1 [file s1]

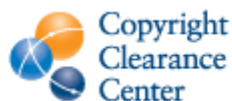

# RightsLink®

[Home](#)
[Account Info](#)
[Help](#)
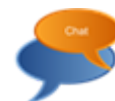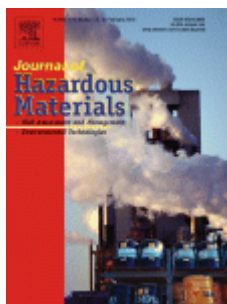

**Title:** Photocatalytic materials and technologies for air purification

**Author:** Hangjuan Ren, Pramod Koshy, Wen-Fan Chen, Shaohua Qi, Charles Christopher Sorrell

**Publication:** Journal of Hazardous Materials

**Publisher:** Elsevier

**Date:** 5 March 2017

Logged in as:  
Olga Vodyankina  
Tomsk State University  
Account #: 3001198492

[LOGOUT](#)

© 2016 Elsevier B.V. All rights reserved.

## Order Completed

Thank you for your order.

This Agreement between Tomsk State University -- Olga Vodyankina ("You") and Elsevier ("Elsevier") consists of your license details and the terms and conditions provided by Elsevier and Copyright Clearance Center.

Your confirmation email will contain your order number for future reference.

### [printable details](#)

|                                                 |                                                                                         |
|-------------------------------------------------|-----------------------------------------------------------------------------------------|
| License Number                                  | 4375860737536                                                                           |
| License date                                    | Jun 25, 2018                                                                            |
| Licensed Content Publisher                      | Elsevier                                                                                |
| Licensed Content Publication                    | Journal of Hazardous Materials                                                          |
| Licensed Content Title                          | Photocatalytic materials and technologies for air purification                          |
| Licensed Content Author                         | Hangjuan Ren, Pramod Koshy, Wen-Fan Chen, Shaohua Qi, Charles Christopher Sorrell       |
| Licensed Content Date                           | Mar 5, 2017                                                                             |
| Licensed Content Volume                         | 325                                                                                     |
| Licensed Content Issue                          | n/a                                                                                     |
| Licensed Content Pages                          | 27                                                                                      |
| Type of Use                                     | reuse in a journal/magazine                                                             |
| Requestor type                                  | author of new work                                                                      |
| Intended publisher of new work                  | MDPI AG                                                                                 |
| Portion                                         | figures/tables/illustrations                                                            |
| Number of figures/tables/illustrations          | 1                                                                                       |
| Format                                          | electronic                                                                              |
| Are you the author of this Elsevier article?    | No                                                                                      |
| Will you be translating?                        | No                                                                                      |
| Original figure numbers                         | Fig. 20                                                                                 |
| Title of the article                            | Ag/CeO <sub>2</sub> composites for catalytic abatement of CO, soot and VOCs             |
| Publication new article is in                   | Catalysts                                                                               |
| Publisher of the new article                    | MDPI AG                                                                                 |
| Author of new article                           | M.V. Grabchenko, N.N. Mikheeva, G.V. Mamontov, M.A. Salaev, L.F. Liotta O.V. Vodyankina |
| Expected publication date                       | Jan 2019                                                                                |
| Estimated size of new article (number of pages) | 38                                                                                      |
| Requestor Location                              | Tomsk State University<br>36, Lenin ave.                                                |

Tomsk, Tomsk region 634050  
Russian Federation  
Attn: Tomsk State University

Publisher Tax ID

GB 494 6272 12

Total

0.00 USD

**ORDER MORE**

**CLOSE WINDOW**

Copyright © 2018 [Copyright Clearance Center, Inc.](#) All Rights Reserved. [Privacy statement](#). [Terms and Conditions](#).  
Comments? We would like to hear from you. E-mail us at [customercare@copyright.com](mailto:customercare@copyright.com)
