# Supplementary material
Source: MDPI journal article supplement (https://www.mdpi.com/2073-4344/8/7/285)
Supplement: s1 [file s1]

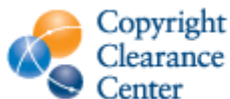

RightsLink®

[Home](#)[Account Info](#)[Help](#)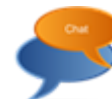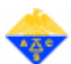ACS Publications  
Most Trusted. Most Cited. Most Read.

**Title:** Catalytically Stable and Active  
CeO<sub>2</sub> Mesoporous Spheres

**Author:** Xin Liang, Junjia Xiao, Biaohua  
Chen, et al

Logged in as:  
Olga Vodyankina  
Tomsk State University  
Account #:  
3001198492

**Publication:** Inorganic Chemistry

**Publisher:** American Chemical Society

**Date:** Sep 1, 2010

[LOGOUT](#)

Copyright © 2010, American Chemical Society

**PERMISSION/LICENSE IS GRANTED FOR YOUR ORDER AT NO CHARGE**

This type of permission/license, instead of the standard Terms & Conditions, is sent to you because no fee is being charged for your order. Please note the following:

- Permission is granted for your request in both print and electronic formats, and translations.
- If figures and/or tables were requested, they may be adapted or used in part.
- Please print this page for your records and send a copy of it to your publisher/graduate school.
- Appropriate credit for the requested material should be given as follows: "Reprinted (adapted) with permission from (COMPLETE REFERENCE CITATION). Copyright (YEAR) American Chemical Society." Insert appropriate information in place of the capitalized words.
- One-time permission is granted only for the use specified in your request. No additional uses are granted (such as derivative works or other editions). For any other uses, please submit a new request.

If credit is given to another source for the material you requested, permission must be obtained from that source.

[BACK](#)[CLOSE WINDOW](#)

Copyright © 2018 [Copyright Clearance Center, Inc.](#) All Rights Reserved. [Privacy statement](#). [Terms and Conditions](#).  
Comments? We would like to hear from you. E-mail us at [customercare@copyright.com](mailto:customercare@copyright.com)
