# Supplementary material
Source: MDPI journal article supplement (https://www.mdpi.com/2073-4344/8/7/285)
Supplement: s1 [file s1]

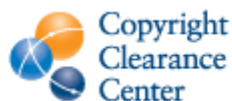

RightsLink®

Home

Account  
Info

Help

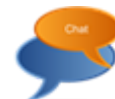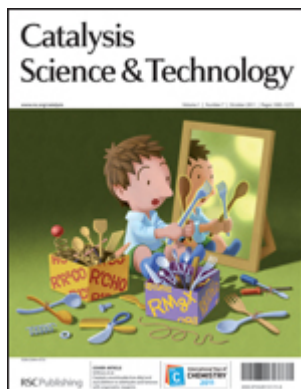

**Title:** Activation and deactivation of Ag/CeO<sub>2</sub> during soot oxidation: influences of interfacial ceria reduction

**Author:** Houlin Wang, Shuang Liu, Zhen Zhao, Xin Zou, Minghan Liu, Wei Liu, Xiaodong Wu, Duan Weng

**Publication:** Catalysis Science & Technology

**Publisher:** Royal Society of Chemistry

**Date:** Apr 13, 2017

Copyright © 2017, Royal Society of Chemistry

Logged in as:

Olga Vodyankina  
Tomsk State University

Account #:  
3001198492

LOGOUT

This reuse request is free of charge. Please review guidelines related to author permissions here:

<http://www.rsc.org/AboutUs/Copyright/Permissionrequests.asp>

BACK

CLOSE WINDOW

Copyright © 2018 [Copyright Clearance Center, Inc.](#) All Rights Reserved. [Privacy statement](#). [Terms and Conditions](#).  
Comments? We would like to hear from you. E-mail us at [customercare@copyright.com](mailto:customercare@copyright.com)
