# Supplementary material
Source: MDPI journal article supplement (https://www.mdpi.com/2073-4344/8/7/285)
Supplement: s1 [file s1]

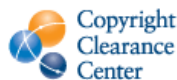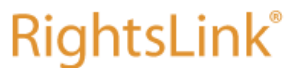
[My Orders](#)
[My Library](#)
[My Profile](#)

 Welcome vodyankina\_o@mail.ru [Log out](#) | [Help](#)
[My Orders](#) > [Orders](#) > [All Orders](#)

## License Details

This Agreement between Tomsk State University -- Olga Vodyankina ("You") and Elsevier ("Elsevier") consists of your license details and the terms and conditions provided by Elsevier and Copyright Clearance Center.

[Print](#)   [Copy](#)

|                                                                 |                                                                                                    |
|-----------------------------------------------------------------|----------------------------------------------------------------------------------------------------|
| <a href="#">License Number</a>                                  | 4375830755623                                                                                      |
| <a href="#">License date</a>                                    | Jun 25, 2018                                                                                       |
| <a href="#">Licensed Content Publisher</a>                      | Elsevier                                                                                           |
| <a href="#">Licensed Content Publication</a>                    | Applied Catalysis B: Environmental                                                                 |
| <a href="#">Licensed Content Title</a>                          | Study of active sites and mechanism for soot oxidation by silver-loaded ceria catalyst             |
| <a href="#">Licensed Content Author</a>                         | Ken-ichi Shimizu, Hiroshi Kawachi, Atsushi Satsuma                                                 |
| <a href="#">Licensed Content Date</a>                           | Apr 26, 2010                                                                                       |
| <a href="#">Licensed Content Volume</a>                         | 96                                                                                                 |
| <a href="#">Licensed Content Issue</a>                          | 1-2                                                                                                |
| <a href="#">Licensed Content Pages</a>                          | 7                                                                                                  |
| <a href="#">Type of Use</a>                                     | reuse in a journal/magazine                                                                        |
| <a href="#">Requestor type</a>                                  | author of new work                                                                                 |
| <a href="#">Intended publisher of new work</a>                  | MDPI AG                                                                                            |
| <a href="#">Portion</a>                                         | figures/tables/illustrations                                                                       |
| <a href="#">Number of figures/tables/illustrations</a>          | 1                                                                                                  |
| <a href="#">Format</a>                                          | electronic                                                                                         |
| <a href="#">Are you the author of this Elsevier article?</a>    | No                                                                                                 |
| <a href="#">Will you be translating?</a>                        | No                                                                                                 |
| <a href="#">Original figure numbers</a>                         | Fig. 10                                                                                            |
| <a href="#">Title of the article</a>                            | Ag/CeO2 composites for catalytic abatement of CO, soot and VOCs                                    |
| <a href="#">Publication new article is in</a>                   | Catalysts                                                                                          |
| <a href="#">Publisher of the new article</a>                    | MDPI AG                                                                                            |
| <a href="#">Author of new article</a>                           | M.V. Grabchenko, N.N. Mikheeva, G.V. Mamontov, M.A. Salaev, L.F. Liotta O.V. Vodyankina            |
| <a href="#">Expected publication date</a>                       | Jan 2019                                                                                           |
| <a href="#">Estimated size of new article (number of pages)</a> | 38                                                                                                 |
| <a href="#">Requestor Location</a>                              | Tomsk State University<br>36, Lenin ave.                                                           |
|                                                                 | Tomsk, Tomsk region 634050<br>Russian Federation<br>Attn: Tomsk State University<br>GB 494 6272 12 |
| <a href="#">Publisher Tax ID</a>                                |                                                                                                    |
| <a href="#">Total</a>                                           | <b>0.00 USD</b>                                                                                    |

[BACK](#)
