# Supplementary material
Source: MDPI journal article supplement (https://www.mdpi.com/2073-4344/8/7/285)
Supplement: s1 [file s1]

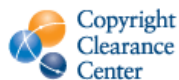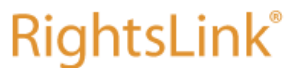[My Orders](#)[My Library](#)[My Profile](#)Welcome vodyankina\_o@mail.ru [Log out](#) | [Help](#)[My Orders](#) > [Orders](#) > [All Orders](#)

## License Details

This Agreement between Tomsk State University -- Olga Vodyankina ("You") and AIP Publishing ("AIP Publishing") consists of your license details and the terms and conditions provided by AIP Publishing and Copyright Clearance Center.

[Print](#) [Copy](#)

|                                              |                                                                                                           |
|----------------------------------------------|-----------------------------------------------------------------------------------------------------------|
| <a href="#">License Number</a>               | 4375861240564                                                                                             |
| <a href="#">License date</a>                 | Jun 25, 2018                                                                                              |
| <a href="#">Licensed Content Publisher</a>   | AIP Publishing                                                                                            |
| <a href="#">Licensed Content Publication</a> | Applied Physics Letters                                                                                   |
| <a href="#">Licensed Content Title</a>       | Photocatalytic degradation mechanisms of self-assembled rose-flower-like CeO2 hierarchical nanostructures |
| <a href="#">Licensed Content Author</a>      | N. Sabari Arul, D. Mangalaraj, Tae Whan Kim                                                               |
| <a href="#">Licensed Content Date</a>        | Jun 3, 2013                                                                                               |
| <a href="#">Licensed Content Volume</a>      | 102                                                                                                       |
| <a href="#">Licensed Content Issue</a>       | 22                                                                                                        |
| <a href="#">Requestor Location</a>           | Tomsk State University<br>36, Lenin ave.                                                                  |
|                                              | Tomsk, Tomsk region 634050<br>Russian Federation<br>Attn: Tomsk State University<br>Invoice               |
| <a href="#">Billing Type</a>                 |                                                                                                           |
| <a href="#">Billing address</a>              | Tomsk State University<br>36, Lenin ave.                                                                  |
|                                              | Tomsk, Russian Federation 634050<br>Attn: Tomsk State University                                          |
| <a href="#">Total</a>                        | <b>0.00 USD</b>                                                                                           |

[BACK](#)
